# Supplementary material for: Insights into the mechanism of action of the arbitrium communication system in SPbeta phages
Source: PubMed Central journal article supplement (PMC9232636; doi:10.1038/s41467-022-31144-3), 2022-06-24
Supplement: 41467_2022_31144_MOESM1_ESM.pdf [file 41467_2022_31144_MOESM1_ESM.pdf]

## Supplementary Information

### Insights into the mechanism of action of the arbitrium communication system present in SPbeta phages

Francisca Gallego del Sol<sup>1</sup>, Nuria Quiles-Puchalt<sup>2,3</sup>, Aisling Brady<sup>2,3</sup>, José R. Penadés<sup>2,3\*</sup>, Alberto Marina<sup>1\*</sup>.

<sup>1</sup>Instituto de Biomedicina de Valencia (IBV-CSIC) and CIBER de Enfermedades Raras (CIBERER), C/ Jaime Roig 11, 46010, Valencia, Spain

<sup>2</sup>Institute of Infection, Immunity and Inflammation, College of Medical, Veterinary and Life Sciences, University of Glasgow, Glasgow, G12 8TA, UK

<sup>3</sup>MRC Centre for Molecular Bacteriology and Infection, Imperial College London, SW7 2AZ, UK.

\*Correspondence:

[amarina@ibv.csic.es](mailto:amarina@ibv.csic.es) (A.M.)

[JoseR.Penades@glasgow.ac.uk](mailto:JoseR.Penades@glasgow.ac.uk) (J.R.P.)

## **CONTENTS**

### **Supplementary Figures**

|                         | page |
|-------------------------|------|
| Supplementary Figure 1  | 3    |
| Supplementary Figure 2  | 4    |
| Supplementary Figure 3  | 5    |
| Supplementary Figure 4  | 6    |
| Supplementary Figure 5  | 7    |
| Supplementary Figure 6  | 8    |
| Supplementary Figure 7  | 9    |
| Supplementary Figure 8  | 10   |
| Supplementary Figure 9  | 11   |
| Supplementary Figure 10 | 12   |

### **Supplementary Tables**

|                       |    |
|-----------------------|----|
| Supplementary Table 1 | 13 |
| Supplementary Table 2 | 14 |
| Supplementary Table 3 | 15 |

|                   |           |
|-------------------|-----------|
| <b>References</b> | <b>16</b> |
|-------------------|-----------|

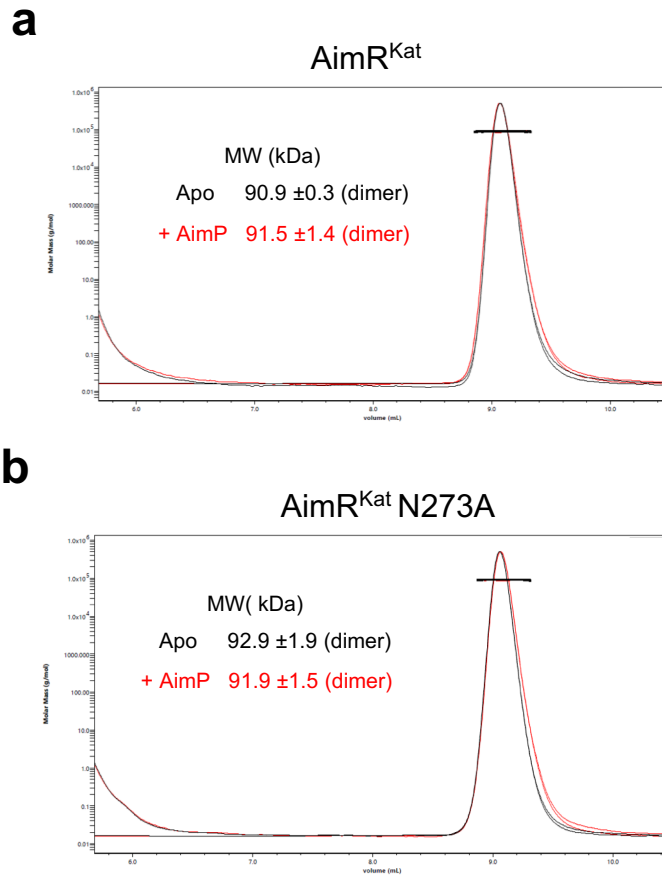

**Supplementary Fig. 1. AimR<sup>kat</sup> is a dimeric protein.** Size exclusion chromatography-multi-angle light scattering (SEC-MALS) chromatograms of **a** AimR<sup>kat</sup> and **b** AimR<sup>kat</sup>-N273A in absence (black) and presence (red) of AimP<sup>kat</sup> peptide (GIVRGA). Chromatograms show the readings from the light scattering (dashed line) and refractive index (continuous line) detectors. The vertical axis represents the molecular mass. The horizontal curves represent the calculated molecular masses. In all cases the molecular weight calculated corresponds to a dimer (90kDa).

|                     |                                                                                                                                                                                          | APO                                                                                                                                                                                                                                    | Peptide                                                                                                                                                                                                | Crystallization Conditions                                                                                                                                                                             |
|---------------------|------------------------------------------------------------------------------------------------------------------------------------------------------------------------------------------|----------------------------------------------------------------------------------------------------------------------------------------------------------------------------------------------------------------------------------------|--------------------------------------------------------------------------------------------------------------------------------------------------------------------------------------------------------|--------------------------------------------------------------------------------------------------------------------------------------------------------------------------------------------------------|
| AimR <sup>Kat</sup> |                                                                                                                                                                                          | <b>Closed</b> <b>PDB: 6S7I</b><br>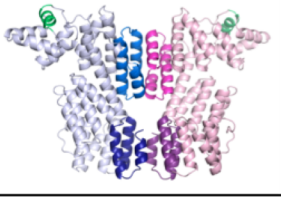<br>Group: P2 <sub>1</sub> 2 <sub>1</sub> 2 <sub>1</sub><br>Cell (Å)<br>a=77,6<br>b=98.3<br>c=144.4<br>Tag: Removed | <b>Closed</b> <b>6S7L</b><br><br>C222 <sub>1</sub><br>a=69.7<br>b=209.8<br>c=140.3<br>Removed                         | <b>Apo</b> : 0.1M HEPES (pH 7.0), 0.1M LiSO <sub>4</sub> , 30 % w/v Polyvinylpyrrolidone<br><b>Peptide</b> : 0.1M MES (pH 6.0), 0.2M Potassium acetate, 15% Pentaerythritol ethoxy, 3% Jeffamine T-403 |
|                     | AimR <sup>SPβ-I</sup>                                                                                                                                                                    | <b>Closed</b> <b>6HP3</b><br><br>P2 <sub>1</sub><br>a=78.9<br>b=251,2<br>c=95,1<br>b=90.9<br>Removed                                                  | <b>Closed</b> <b>6PH5</b><br><br>P2 <sub>1</sub><br>a=54.1<br>b=79,1<br>c=55.2<br>b=106.6<br>Removed                  | <b>6HP3</b> : 0.1 M MES (pH 6.5), 0.55 M NaCl, 15% PEG4000.<br><b>6PH5</b> : 1.5 M (NH <sub>4</sub> ) <sub>2</sub> SO <sub>4</sub>                                                                     |
| AimR <sup>SPβ</sup> | AimR <sup>SPβ-II</sup>                                                                                                                                                                   | <b>Open</b> <b>6JG5</b><br><br>P2 <sub>1</sub> 2 <sub>1</sub> 2<br>a=115,3<br>b=219.4<br>c=33.5<br>C-ter LEHHHHHH                                     | <b>Open</b> <b>6JG9</b><br><br>P2 <sub>1</sub> 2 <sub>1</sub> 2<br>a=120,9<br>b=214.0<br>c=33.6<br>C-ter LEHHHHHH     | <b>6JG5</b> : 0.1 M Na cacodylate (pH 6.6), 11% PEG 8000, 0.2 M NaCl<br><b>6JG9</b> : 0.1 M Na cacodylate (pH 6.1), 9% PEG 8000, 0.2 M NaBr, 5 mM DTT                                                  |
|                     |                                                                                                                                                                                          | <b>Open</b> <b>5XYB</b><br><br>P2 <sub>1</sub> 2 <sub>1</sub> 2<br>a=114,8<br>b=220.4<br>c=33.6<br>C-ter LEHHHHHH                                    | <b>Open</b> <b>5Y24</b><br><br>P2 <sub>1</sub> 2 <sub>1</sub> 2<br>a=119,6<br>b=214.4<br>c=33.6<br>C-ter LEHHHHHH    | <b>5XYB</b> : 0.1 M Na cacodylate (pH 6.0) 10% PEG 8000, 0.2 M NaCl<br><b>5Y24</b> : 0.1 M Na cacodylate (pH 6.1), 9% PEG 8000, 0.2 M NaBr, 5 mM DTT                                                   |
|                     |                                                                                                                                                                                          | <b>Open</b> <b>5ZW5</b><br><br>P2 <sub>1</sub> 2 <sub>1</sub> 2 <sub>1</sub><br>a=124,7<br>b=207.1<br>c=33.3<br>C-ter LEYAHHHHHH                    | <b>Open</b> <b>5ZW6</b><br><br>P2 <sub>1</sub> 2 <sub>1</sub> 2<br>a=150,8<br>b=193.6<br>c=33.2<br>C-ter LEYAHHHHHH | <b>5ZW5</b> : 200 mM CaCl <sub>2</sub> , 20% PEG3350<br><b>5ZW6</b> : 100 mM sodium-citrate (pH 4.0), 200 mM citric acid, 20% PEG3350                                                                  |
|                     |                                                                                                                                                                                          | <b>Open</b> <b>6IPX</b><br><br>P2 <sub>1</sub> 2 <sub>1</sub> 2<br>a=120,5<br>b=214.7<br>c=33.7<br>C-ter LEYAHHHHHH                                 | <b>Open</b> <b>6IM4</b><br><br>P2 <sub>1</sub> 2 <sub>1</sub> 2<br>a=121,7<br>b=214.2<br>c=33.9<br>C-ter LEYAHHHHHH | <b>6IPX</b> : 0.1 M HEPES (pH 6.5-7.5), 20% (v/v) PEG 4000, 50 mM magnesium acetate<br><b>6IM4</b> : 0.1 M HEPES (pH 6.5-7.5), 20% (v/v) PEG 4000, 50 mM magnesium acetate                             |
|                     |                                                                                                                                                                                          | <b>Open</b> <b>5ZVW</b><br><br>P2 <sub>1</sub><br>a=61.5<br>b=116,9<br>c=68,2<br>b=113.6<br>Removed                                                 | <b>Open</b> <b>5ZVW</b><br><br>P32<br>a=59,3<br>b=59,3<br>c=104,7<br>Removed                                        | <b>5ZVW</b> : 100 mM Bis-Tris (pH 6.5-7.0), 2% Tacsimate (pH 6.0), 20% PEG3350<br><b>5ZVW</b> : 100 mM Bis-Tris (pH 5.5), 200 mM (NH <sub>4</sub> ) <sub>2</sub> SO <sub>4</sub> , 20% PEG3350         |
| AimR <sup>Phi</sup> | <b>Closed</b> <b>5ZVV</b><br><br>P2 <sub>1</sub><br>a=61.5<br>b=116,9<br>c=68,2<br>b=113.6<br>Removed | <b>Closed</b> <b>5ZVW</b><br><br>P32<br>a=59,3<br>b=59,3<br>c=104,7<br>Removed                                                                      | <b>5ZVV</b> : 100 mM Bis-Tris (pH 6.5-7.0), 2% Tacsimate (pH 6.0), 20% PEG3350<br><b>5ZVW</b> : 100 mM Bis-Tris (pH 5.5), 200 mM (NH <sub>4</sub> ) <sub>2</sub> SO <sub>4</sub> , 20% PEG3350         |                                                                                                                                                                                                        |

**Supplementary Fig. 2. AimR reported structures.** The structures for AimR<sup>Kat</sup>, AimR<sup>SPβ</sup> and AimR<sup>Phi</sup> in their apo and AimP-bound are shown in cartoon rendering with protomers colored in blue and pink. Dimerization Interfaces are highlighted with brighter or darkest tones the slipping surface or capping helices, respectively. DNA recognition helices  $\alpha$ 3 are highlighted in green. For each structure its PDB code, space group, cell size and the presence of tags in the crystallized protein as well as the crystallization conditions are indicated. Depending on the use of one or two dimerization surfaces, the structures are classified as presenting open or closed conformation, respectively.

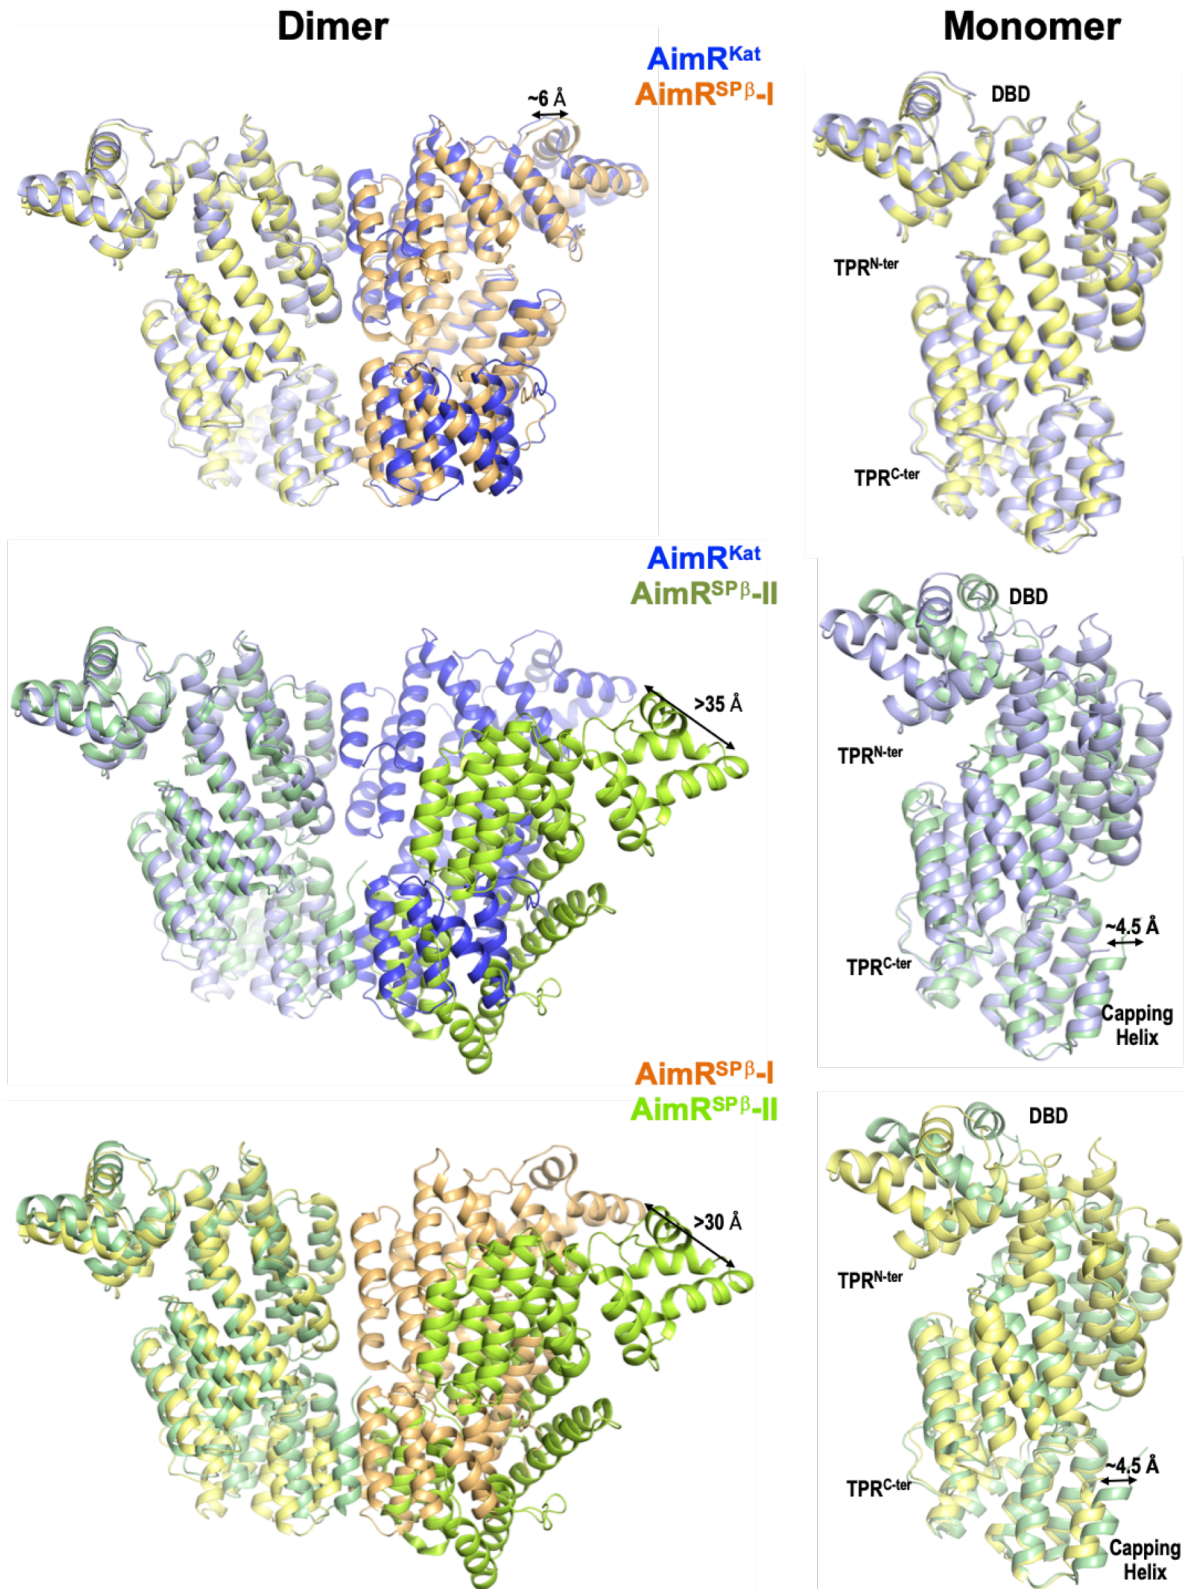

**Supplementary Fig. 3. Comparison of AimR receptors in the Apo state.** On the *left* is shown the pairwise comparison of AimR<sup>Kat</sup> (blue tones), AimR<sup>SPβ-I</sup> (yellow-orange shades; PDB 6HP3) and AimR<sup>SPβ-II</sup> (green shades; PDB 6IPX) receptors in apo state by superimposing a protomer (left) of these dimers. While the second protomer is packed closed for the AimR<sup>Kat</sup> and AimR<sup>SPβ-I</sup> dimers, showing both a very similar dimeric organization, in AimR<sup>SPβ-II</sup> the second protomer moves away (more than 30 Å with respect to the apposition of the second protomer in the other structures) showing an open conformation. Superimposition of the individual protomers (*right*) shows an almost identical conformation in all the structures with only small displacements in the capping helices used by AimRs to dimerize that, in the case of AimR<sup>SPβ-II</sup>, includes the extra His-tag.

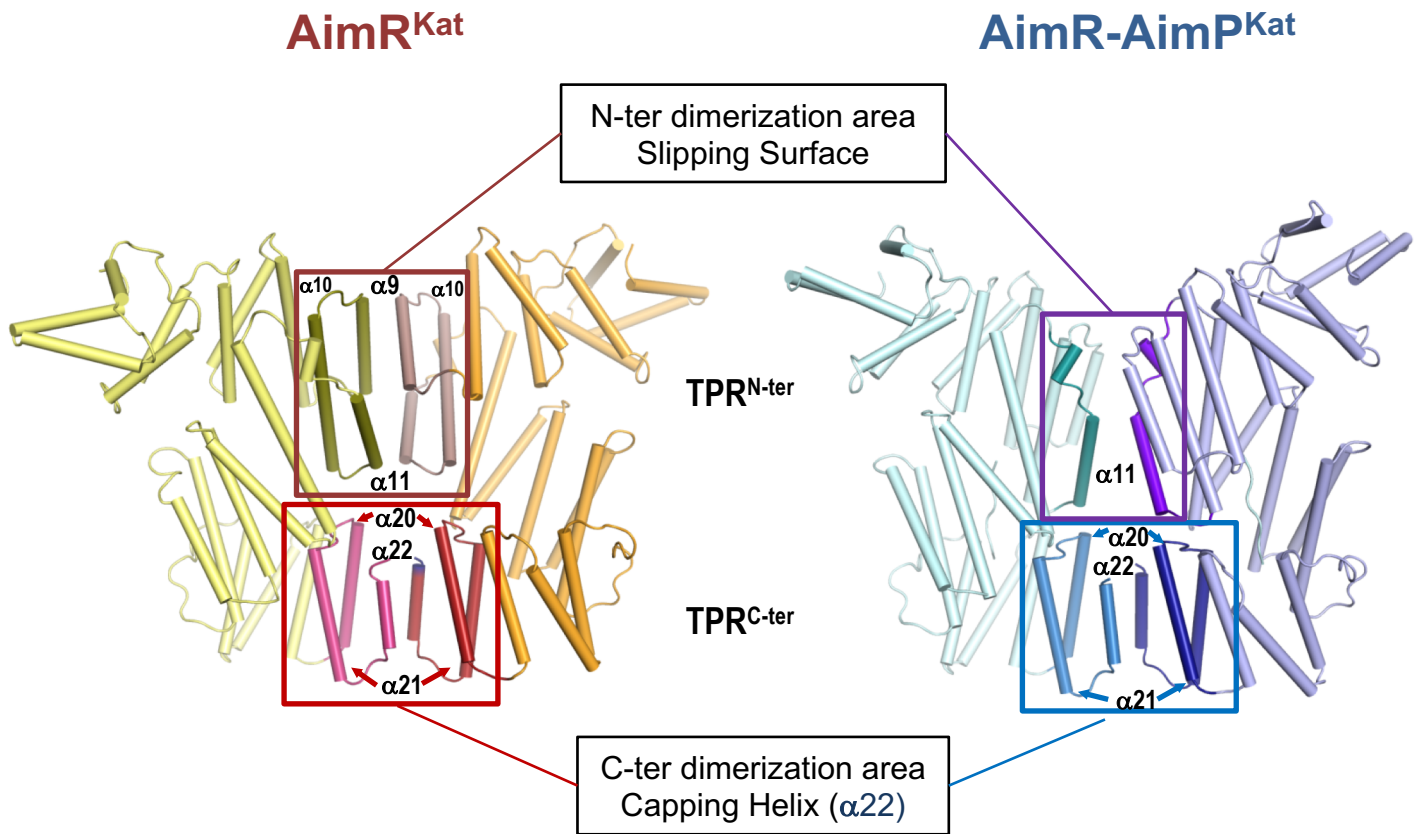

**Supplementary Fig. 4. Two dimerization surfaces allow AimP-induced rearrangements to AimR receptors.** Cartoon rendering with helices as cylinders of AimR<sup>Kat</sup> dimers in apo (left; in yellow-orange tones) and AimP-bound (right, blue tones) states. The two dimerization areas presented in the dimer are highlighted with more intense tones and the structural elements participating in the interactions are labelled. While the C-terminal dimerization area, including the capping-helix, maintains identical contacts in both structures, the N-terminal area acts as a slipping surface changing the interactions between structures.

**a**

|                           |            |                                     |                                     |                                     |
|---------------------------|------------|-------------------------------------|-------------------------------------|-------------------------------------|
|                           | No peptide | <b>AimP<sup>Kat</sup></b><br>GIVRGA | <b>AimP<sup>SPβ</sup></b><br>GMPRGA | <b>AimP<sup>Phi</sup></b><br>SAIRGA |
| <b>T<sub>m</sub> (°C)</b> | <b>41</b>  | <b>61</b>                           | <b>43</b>                           | <b>43</b>                           |

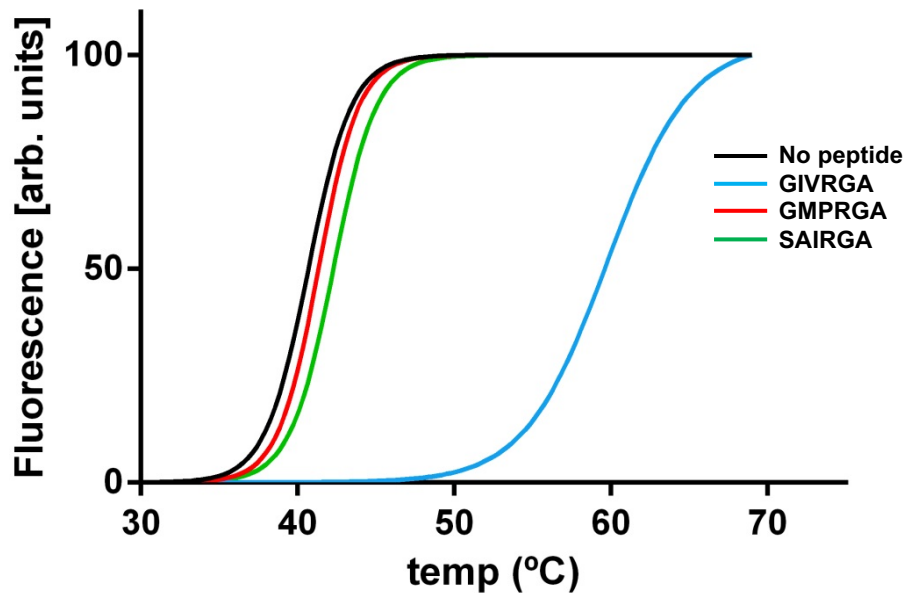**b**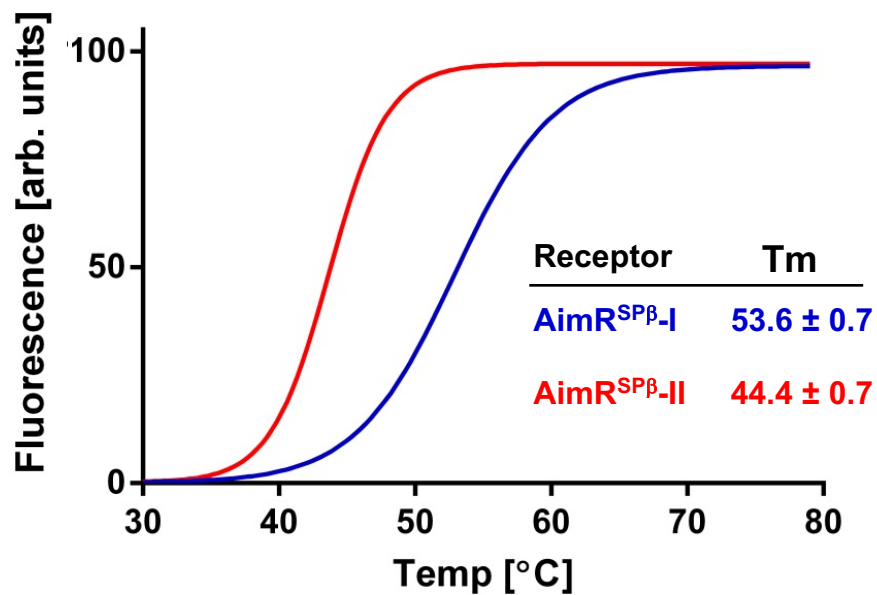

**Figure 5. Thermal shift assay for AimR<sup>Kat</sup> and AimR<sup>SPβ</sup>.** **a** The denaturation T<sub>m</sub> of AimR<sup>Kat</sup> in its apo form (black line) shows an increment in the presence of GIVRGA peptide (blue line), its AimP, but not in the presence of GMPRGA peptide (red line) or SAIRGA peptide (green line), the AimPs from SPβ and Phi3T phages, respectively. All peptides were assayed at 0.5mM concentration. **b** AimR<sup>SPβ</sup> stability decreases by the presence of C-terminal His-tag how confirms denaturation curves of AimR<sup>SPβ</sup> with (AimR<sup>SPβ</sup>-II; red curve) and without (AimR<sup>SPβ</sup>-I; blue curve) this tag. Source data are provided as a Source Data file.

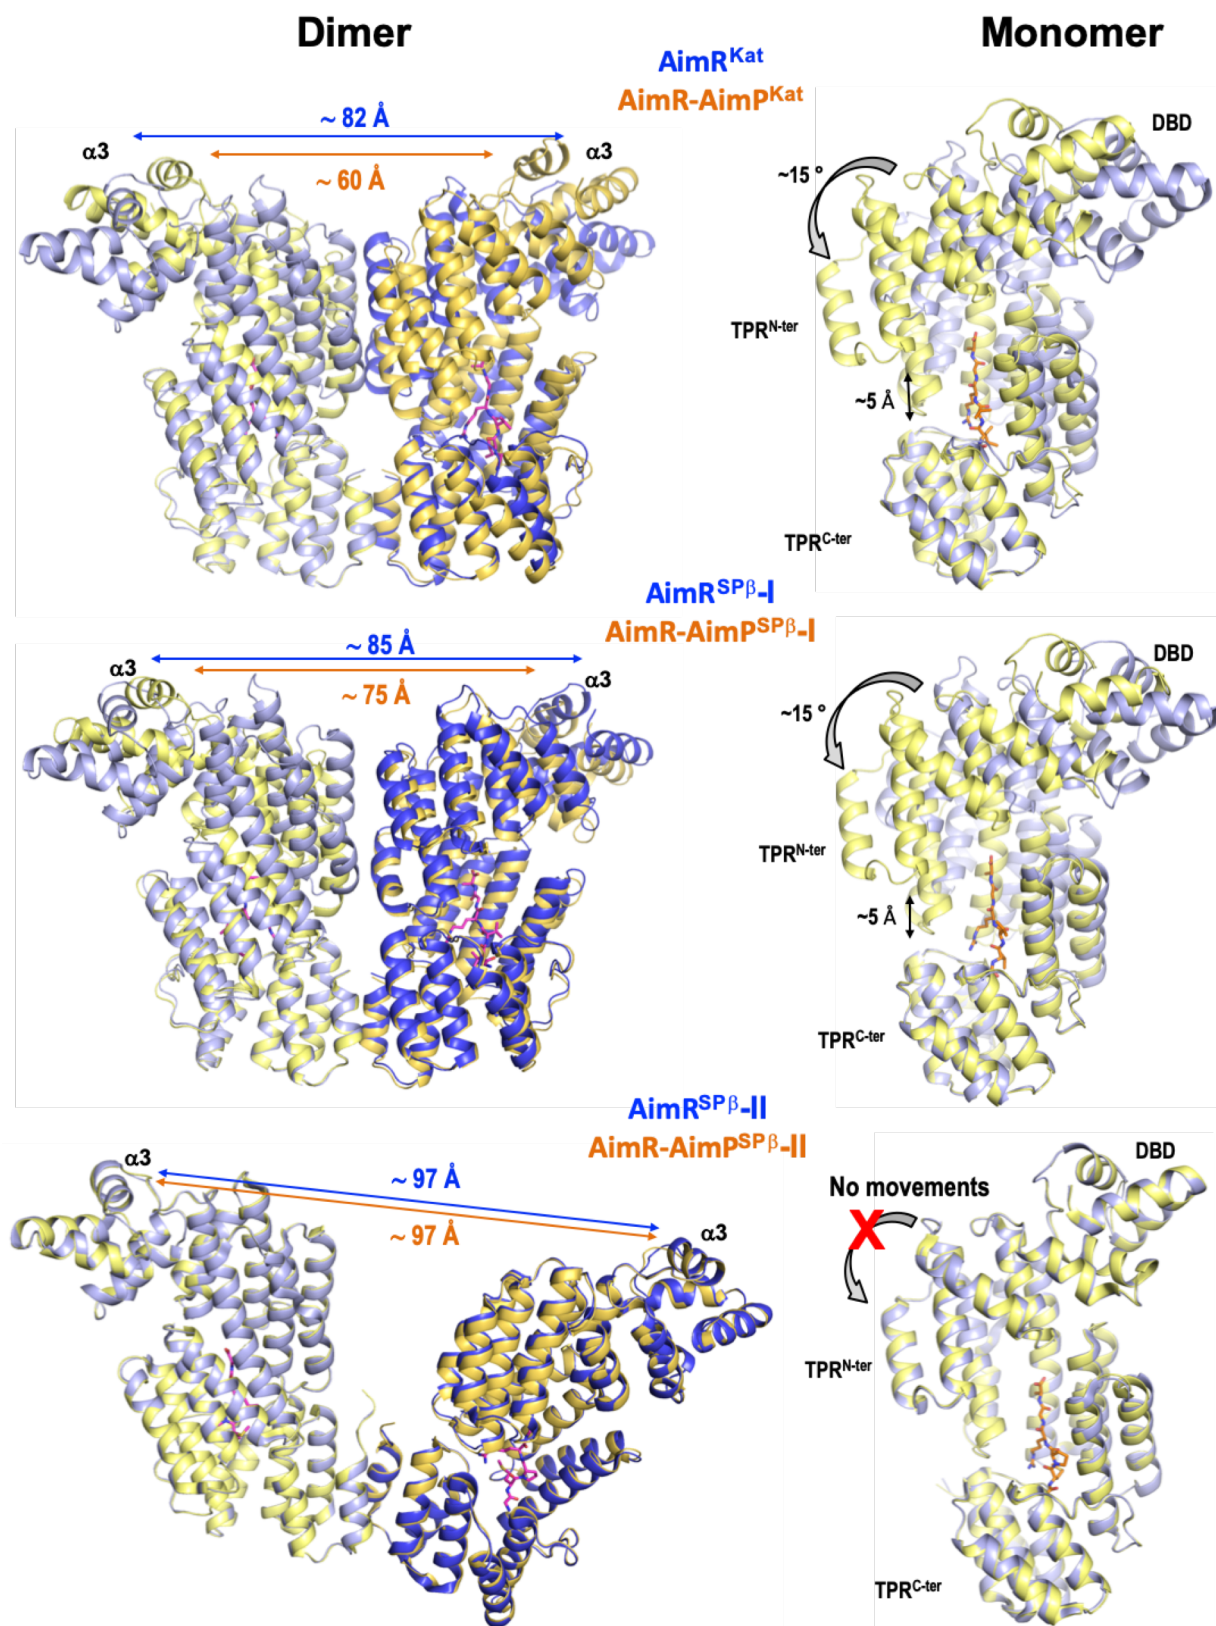

**Supplementary Fig. 6. AimP-induced conformational changes in AimR receptors. Structural comparison of AimR<sup>Kat</sup>, AimR<sup>SPβ-I</sup> and AimR<sup>SPβ-II</sup> receptors in their apo (blue tones) and AimP-bound (yellow-orange tones) states. The structural superimposition shows how AimP binding induces in the protomer (*right*) a closure movement that brings together TPR<sup>N-ter</sup> and TPR<sup>C-ter</sup> domains for the AimR<sup>Kat</sup> and AimR<sup>SPβ-I</sup> structures. These conformational changes translate to the dimers (*left*) in the reduction of the distance between  $\alpha 3$  helices. On de contrary, AimP does not induce any changes for AimR<sup>SPβ-II</sup> whose protomers present identical conformations in both states and, consequently, the corresponding dimers are structurally identical.**



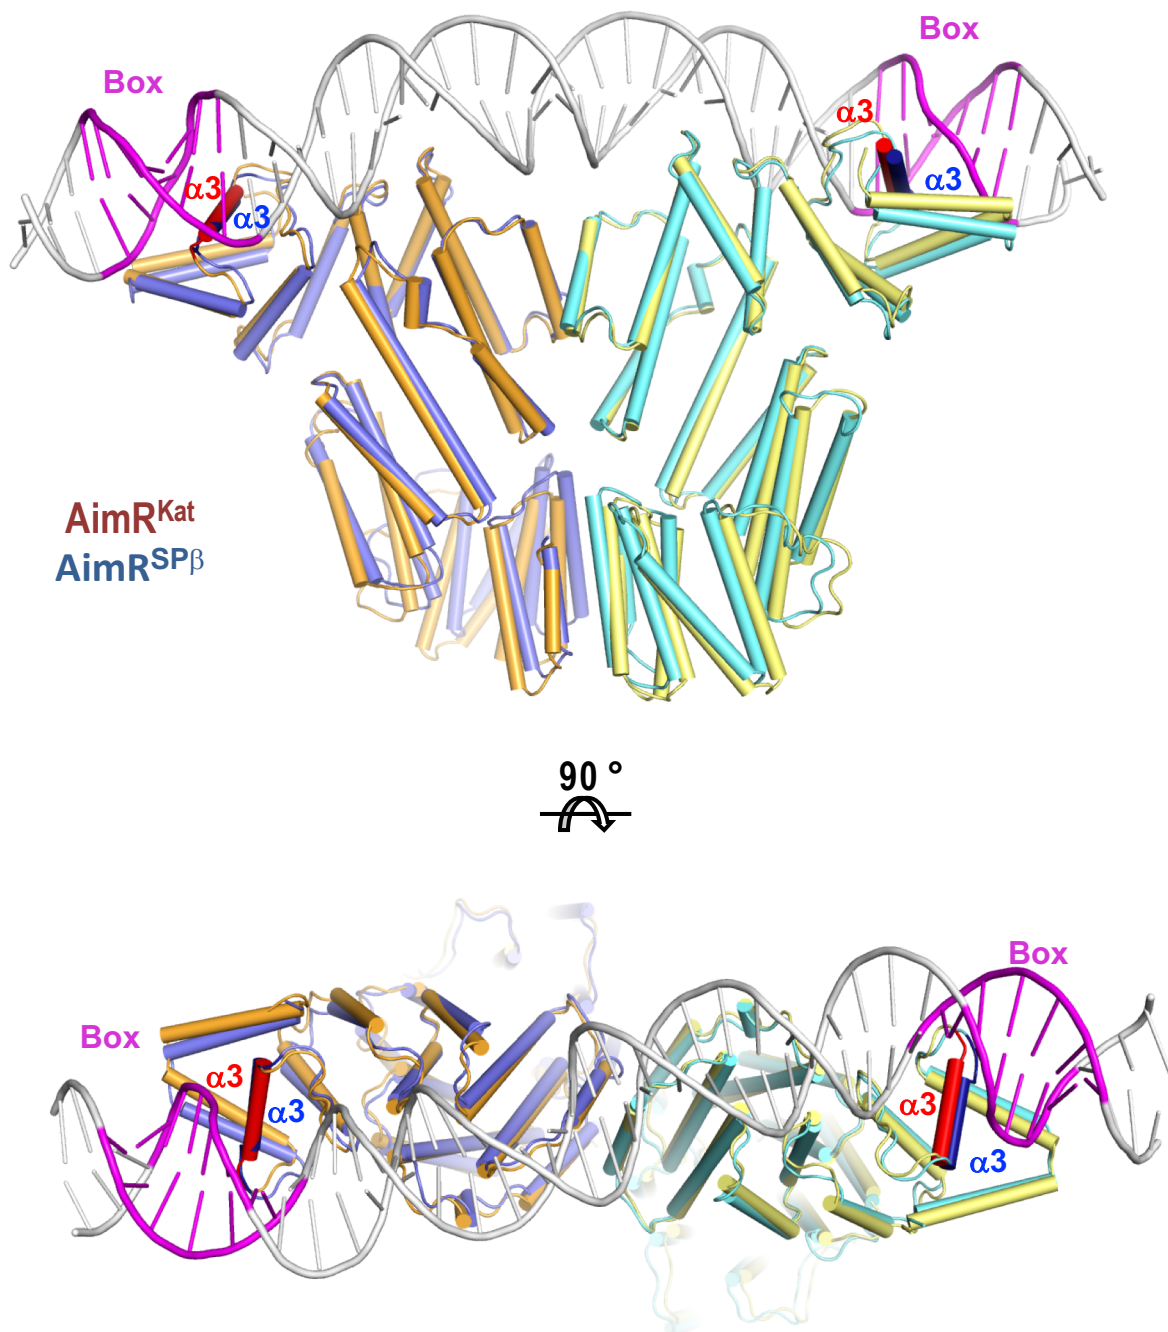

**Supplementary Fig. 7. AimR<sup>kat</sup> in its apo state presents a DNA-binding competent conformation.** The superposition of AimR<sup>kat</sup> in its apo state (yellow-orange tones) on the DNA-bound AimR<sup>SPβ</sup> structure (PDB 6pH7; blue-cyan tones) shows that the DBD domains and the  $\alpha 3$  helices (darker tones) occupy identical positions in both structures and, therefore, the helices are perfectly positioned for the DNA boxes (highlighted in magenta) read-out. Two orthogonal views are shown with the AimRs rendered in cartoon and the DNA in backbone.

|                              | APO                                                                                                | PEPTIDE                                                                                            | DNA                                                                                                 |
|------------------------------|----------------------------------------------------------------------------------------------------|----------------------------------------------------------------------------------------------------|-----------------------------------------------------------------------------------------------------|
| <b>AimR<sup>kat</sup></b>    | 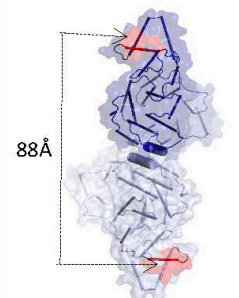<br><b>6S7I</b>   | <br><b>6S7L</b>  | <br><b>7Q0N</b>  |
| <b>AimR<sup>SPβ</sup></b>    | <br><b>6HP3</b>   | <br><b>6HP5</b>  | <br><b>6HP7</b>  |
| <b>AimR<sup>SPβ-II</sup></b> | <br><b>6JG5</b>  | <br><b>6JG9</b> | <br><b>6JG8</b> |
| <b>AimR<sup>phi</sup></b>    | <br><b>5ZVV</b> |                                                                                                    |                                                                                                     |

**Supplementary Fig. 8. Distances between DNA binding helices in AimR reported structures.** The structures for AimR<sup>kat</sup>, AimR<sup>SPβ</sup> and AimR<sup>Phi</sup> in their apo (colored in blue tones), AimP-bound (colored in pink tones) and DNA-bound (colored in yellow tones with DNA in green) are shown in cartoon rendering, with protomer A in darker tones. Dimerization slipping Interfaces are shown with cylindrical helices. DNA recognition helices  $\alpha 3$  are highlighted in red, with distances between  $\alpha 3$  helices of protomers A and B indicated in each case. C-terminal His-tag C are shown in sticks and coloured in light green in those structures where they are present. For each structure its PDB code is indicated.

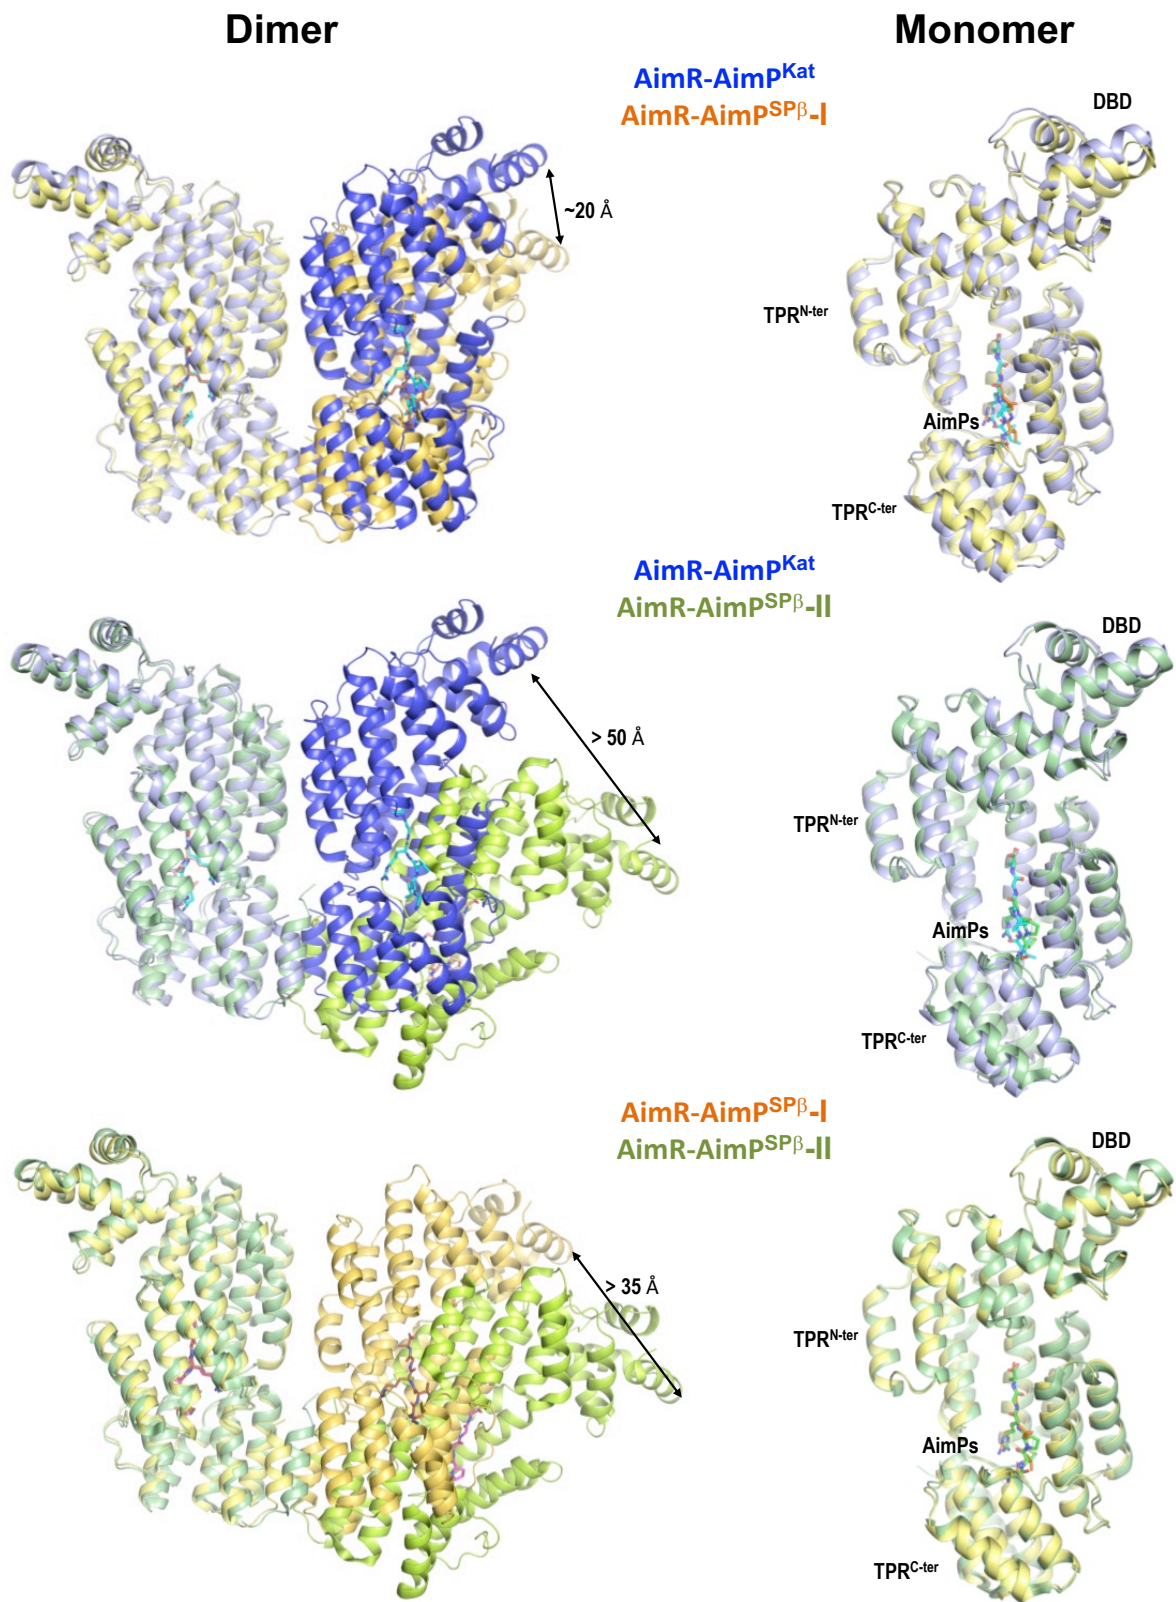

**Supplementary Fig. 9. Structural comparison of AimR receptors in their AimP-bound state.** The superposition of AimR<sup>kat</sup>, AimR<sup>SPβ-I</sup> and AimR<sup>SPβ-II</sup> receptors bound to their cognate AimPs shows that the individual protomers (*right*) present identical conformation. However, the organization of the dimers (*left*) is quite different, changing the relative disposition of the second protomer, which is surprising in the comparison of AimR<sup>SPβ-I</sup> with AimR<sup>SPβ-II</sup> since both structures correspond to the same protein in complex with the same peptide.

**a**

| Name       | Strain                     | Genome ID        | AimR NCBI Ref  | AimP NCBI Ref  |
|------------|----------------------------|------------------|----------------|----------------|
| SPbeta     | <i>Bacillus subtilis</i>   | NC_001884.1      | WP_009968986.1 | WP_009967508.1 |
| Katmira    | <i>Bacillus subtilis</i>   | JMEF01000083.1   | WP_033885437.1 | WP_134819006.1 |
| SRCM102756 | <i>Bacillus subtilis</i>   | NZ_CP028218.1    | WP_160244980.1 | WP_160243822.1 |
| NMTD54     | <i>Bacillus atrophaeus</i> | NZ_PVQN0100007.1 | WP_106034888.1 | WP_142394717.1 |
| Phi3T      | <i>Bacillus subtilis</i>   | KY030782.1       | WP_153256842.1 | WP_134982144   |
| JNUCC      | <i>Bacillus subtilis</i>   | NZ_VPFB0.000001  | WP_147772092.1 | WP_147772091.1 |
| B4073      | <i>Bacillus subtilis</i>   | NZ_JXHP0.000037  | WP_041338585.1 | WP_142350264.1 |
| SMRC103612 | <i>Bacillus subtilis</i>   | CP035406.1       | WP_059293807.1 | WP_139236146.1 |

**b**

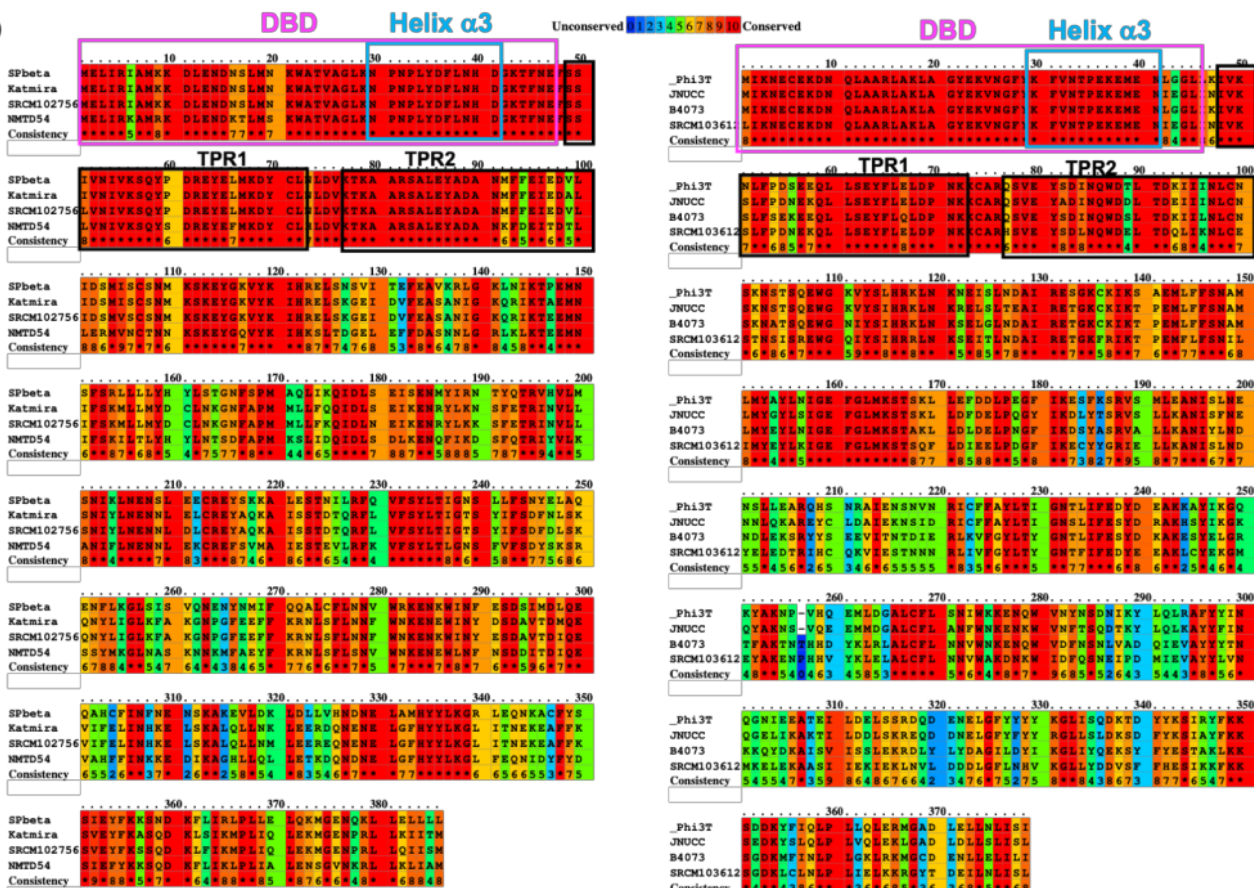

**c**

SPbeta **ATCACTTAAATATTAGGTTTATAACATCTAGTGTAT**  
 Katmira **ATCACTTAAATATTAGGTTTATAACATCTAGTGTAT**  
 SRCM102756 **ATCACTTAAATATTAGGTTTATAACATCTAGTGTAT**  
 NMTD54 **ATCACGAGATAAATTCGAATTCGCATAACTAAGGGAT**

Phi3T **AAGTTCAGAAATTCAAAAATCAAAAAATAGAACAT**  
 JNUCC **AAGTTCAGGAATTCAAAATGAAAAATGAGAACAT**  
 B4073 **AAGTTCAGAAATTCAAAAATCAAAAAATAGAACAT**  
 SMRC103612 **AAGTTCAGGAATTCAAAATGAAAAATGAGAACAT**

**d**

SPbeta **MKKLIMALVILGALGTSYISAD-SSIQQASGDYEVAGMVRGA**  
 Katmira **MKKFIMAIIAAVLSISFVGAKASSNEQASGDYEVAGIVRGA**  
 SRCM102756 **MKKFIMAIIAAVLSISFVGAKASSNEQASGDYEVAGVVRGA**  
 NMTD54 **MKKVIMSALIVSVALAVFVGSNINKSNEASEEYVAGMVRGA**

Phi3T **MKKVFFGLVILTALAISFVAGQSVSTASASDEVTVASAIRGA**  
 JNUCC **MKKVIYGLMIIAALAVSFVAGQSVSTASTSDEISVASIIRGA**  
 B4073 **MKKVLYSLIIIVIALAVGVGGQKSMETASVDQP IKVASPSRGA**  
 SMRC103612 **MKKIYFGLVILLALAVGVFSGQSVETA--SGDVTVASASRGA**

**AimR receptors chimerity.** **a** Arbitrum system compared showing similarities to those of SPβ (green background) or Phi3T (blue background). **b-d** Alignments of AimR receptors (**b**), DNA operators (**c**) and AimPs peptides (**d**) for systems showing chimerity trails with SPβ (*left*) and Phi3T (*right*). AimR alignments in **b** were performed with PRALINE (matrix BLOSUM62) server and are colored according to relative conservation. The location of DBD, helix α3, TPR1 and TPR2 are highlighted in boxes and labelled. Palindromic sequences for the DNA operators are highlighted in (**c**), as well as mature peptides (**d**)

## Supplementary Tables

Supplementary Table 1. Data collection and refinement statistics

|                                                     | AimR <sup>Kat</sup>                           | AimR-AimP <sup>Kat</sup>   | AimR <sup>Kat</sup> -DNA  |
|-----------------------------------------------------|-----------------------------------------------|----------------------------|---------------------------|
| <b>Data collection</b>                              |                                               |                            |                           |
| Space group                                         | P2 <sub>1</sub> 2 <sub>1</sub> 2 <sub>1</sub> | C222 <sub>1</sub>          | P2 <sub>1</sub>           |
| Cell dimensions                                     |                                               |                            |                           |
| <i>a</i> , <i>b</i> , <i>c</i> (Å)                  | 77.58, 98.30,<br>144.35                       | 69.70, 209.76,<br>140.25   | 132.72, 39.87,<br>143.01  |
| $\alpha$ , $\beta$ , $\gamma$ (°)                   | 90, 90, 90                                    | 90, 90, 90                 | 90, 100.49, 90            |
| Resolution (Å)                                      | 72.2-2.4 (2.46-<br>2.4)*                      | 144.1-2.6 (2.77-<br>2.7)   | 65.3-2.5<br>(2.57-2.5)    |
| <i>R</i> <sub>pym</sub>                             | 0.03 (0.40)                                   | 0.05 (0.61)                | 0.04 (0.73)               |
| <i>I</i> / $\sigma$ <i>I</i>                        | 13.5 (1.9)                                    | 9.5 (1.2)                  | 10.6 (1.0)                |
| Completeness (%)                                    | 99.7 (100)                                    | 99.8 (99.9)                | 96.4 (75.8)               |
| Redundancy                                          | 12.6 (13.5)                                   | 4.7 (5.0)                  | 6.4 (5.3)                 |
| <b>Refinement</b>                                   |                                               |                            |                           |
| Resolution (Å)                                      | 2.4                                           | 2.6                        | 2.5                       |
| No. reflections                                     | 43780(4329)                                   | 28616 (2830)               | 50316 (3867)              |
| <i>R</i> <sub>work</sub> / <i>R</i> <sub>free</sub> | 0.22(0.33)/<br>0.25(0.37)                     | 0.18 (0.31)/<br>0.22(0.31) | 0.20(0.40)/<br>0.25(0.39) |
| No. atoms                                           |                                               |                            |                           |
| Macromolecules                                      | 6455                                          | 6434                       | 8226                      |
| Ligand/ion                                          | 20                                            | 12                         | 35                        |
| Water                                               | 67                                            | 11                         | 49                        |
| <i>B</i> -factors                                   |                                               |                            |                           |
| Macromolecules                                      | 60.70                                         | 66.50                      | 91.05                     |
| Ligand/ion                                          | 114.20                                        | 96.00                      | 141.80                    |
| Water                                               | 65.80                                         | 67.30                      | 70.90                     |
| R.m.s. deviations                                   |                                               |                            |                           |
| Bond lengths (Å)                                    | 0.014                                         | 0.014                      | 0.016                     |
| Bond angles (°)                                     | 1.734                                         | 1.760                      | 1.93                      |

\*Values in parentheses are for highest-resolution shell.

**Supplementary Table 2. Strains and plasmids used in this study.**

| Strain or plasmid                  | Genotype                                                                                                                                                                   | Reference               |
|------------------------------------|----------------------------------------------------------------------------------------------------------------------------------------------------------------------------|-------------------------|
| <b>Strains</b>                     |                                                                                                                                                                            |                         |
| B. subtilis strain 168             | <i>trpC2</i>                                                                                                                                                               | 1                       |
| B. subtilis $\Delta 6$             | <i>trpC2</i> ; $\Delta SP\beta$ ; <i>sublancin 168-sensitive</i> ; $\Delta skin$ ; $\Delta PBSX$ ; $\Delta prophage 1$ ; <i>pks::Cm</i> ; $\Delta prophage 3$ ; <i>Cmr</i> | 2                       |
| B. subtilis subsp.<br>KATMIRA 1933 |                                                                                                                                                                            | 3                       |
| BKK20860                           | <i>trpC2</i> $\Delta yopK::kan$<br><br>s                                                                                                                                   | 4                       |
| JP19877                            | $\Delta 6$ lysogenic SPbeta                                                                                                                                                | This work               |
| JP19936                            | $\Delta 6$ $\Delta aimR_{SP\beta}$                                                                                                                                         | This work               |
| JP19982                            | JP19877 <i>amyE::P<sub>spank</sub></i>                                                                                                                                     | This work               |
| JP20009                            | JP19877 <i>amyE::P<sub>spank</sub>-aimR<sub>SP\beta</sub></i>                                                                                                              | This work               |
| JP19944                            | $\Delta 6$ <i>amyE::P<sub>spank</sub>-aimR<sub>SP\beta</sub></i>                                                                                                           | This work               |
| JP20222                            | JP19936 <i>amyE::P<sub>spank</sub></i>                                                                                                                                     | This work               |
| JP20223                            | JP19936 <i>amyE::P<sub>spank</sub>-aimR<sub>SP\beta</sub></i>                                                                                                              | This work               |
| JP20224                            | JP19936 <i>amyE::P<sub>spank</sub>-aimR<sub>Kat</sub></i>                                                                                                                  | This work               |
| JP20147                            | JP19936 <i>amyE::P<sub>spank</sub>-aimR<sub>SP\beta</sub> 6xHis Ct</i>                                                                                                     | This work               |
| <b>Plasmids</b>                    |                                                                                                                                                                            |                         |
| pDR244                             | <i>B. subtilis</i> temperature-sensitive plasmid with constitutively expressed Cre recombinase                                                                             | 4                       |
| pMiniMAD2                          | <i>B. subtilis</i> temperature-sensitive plasmid with erythromycin resistance                                                                                              | 5                       |
| pDR110                             | <i>B. subtilis</i> <i>amyE</i> integration vector containing IPTG-inducible <i>P<sub>spank</sub></i> promoter                                                              | 6                       |
| pJP2340                            | pDR100 <i>aimR<sub>SP\beta</sub></i>                                                                                                                                       | This work               |
| pJP2341                            | pDR100 <i>aimR<sub>SPKat</sub></i>                                                                                                                                         | This work               |
| pJP2342                            | pDR100 <i>aimR<sub>SP\beta</sub> 6xHis Ct</i>                                                                                                                              | This work               |
| pLIC-SGC1                          | pET expression vector with N-terminal His <sub>6</sub> and TEV protease cleavage site. Includes sites for LIC cloning.                                                     | Addgene plasmid # 39187 |
| pLIC-AimRKat33                     | pLIC containing <i>aimR<sup>kat</sup></i> cloned                                                                                                                           | This work               |
| pLIC-AimRKat33 <sup>N273A</sup>    | pLIC containing <i>aimR<sup>kat</sup></i> with mutation N273A cloned                                                                                                       | This work               |
| pLIC-AimR <sup>SP\beta</sup>       | pLIC containing <i>aimR<sup>SP\beta</sup></i> cloned                                                                                                                       | 7                       |
| PET21b                             | pET expression vector                                                                                                                                                      | Novagene                |
| pET-AimR <sup>SP\beta</sup> -II    | pET21b containing <i>aimR<sup>SP\beta</sup></i> cloned                                                                                                                     | This work               |



## References

1. Zeigler, D. R. *et al.* The origins of 168, W23, and other *Bacillus subtilis* legacy strains. *Journal of bacteriology* **190**, 6983–95 (2008).
2. Westers, H. *et al.* Genome Engineering Reveals Large Dispensable Regions in *Bacillus subtilis*. *Molecular Biology and Evolution* **20**, 2076–2090 (2003).
3. Karlyshev, A. v., Melnikov, V. G. & Chikindas, M. L. Draft genome sequence of *Bacillus subtilis* strain KATMIRA1933. *Genome Announcements* **2**, 619–633 (2014).
4. Koo, B.-M. *et al.* Construction and Analysis of Two Genome-Scale Deletion Libraries for *Bacillus subtilis*. *Cell Systems* **4**, 291-305.e7 (2017).
5. Patrick, J. E. & Kearns, D. B. MinJ (YvjD) is a topological determinant of cell division in *Bacillus subtilis*. *Molecular Microbiology* **70**, 1166–1179 (2008).
6. Carniol, K., Ben-Yehuda, S., King, N. & Losick, R. Genetic dissection of the sporulation protein SpoIIIE and its role in asymmetric division in *Bacillus subtilis*. *Journal of bacteriology* **187**, 3511–20 (2005).
7. Gallego del Sol, F., Penadés, J. R. & Marina, A. Deciphering the Molecular Mechanism Underpinning Phage Arbitrium Communication Systems. *Molecular Cell* **74**, 59-72.e3 (2019).
